# Supplementary material for: An ZnMgO:PVP inorganic–organic hybrid electron transport layer: towards efficient bottom-emission and transparent quantum dot light-emitting diodes
Source: Royal Society of Chemistry journal article supplement (doi:10.1039/c8tc06121a), 2019-01-01
Supplement: c8tc06121a1.pdf [file c8tc06121a1.pdf]

# Supporting Information

**ZnMgO:PVP inorganic–organic hybrid electron transport layer:  
Towards efficient bottom-emission and transparent quantum dot  
light-emitting diodes**

Heng Zhang, Shuming Chen\*

Department of Electrical and Electronic Engineering, Southern University of Science  
and Technology, Shenzhen, 518055, P. R. China

[chen.sm@sustc.edu.cn](mailto:chen.sm@sustc.edu.cn)

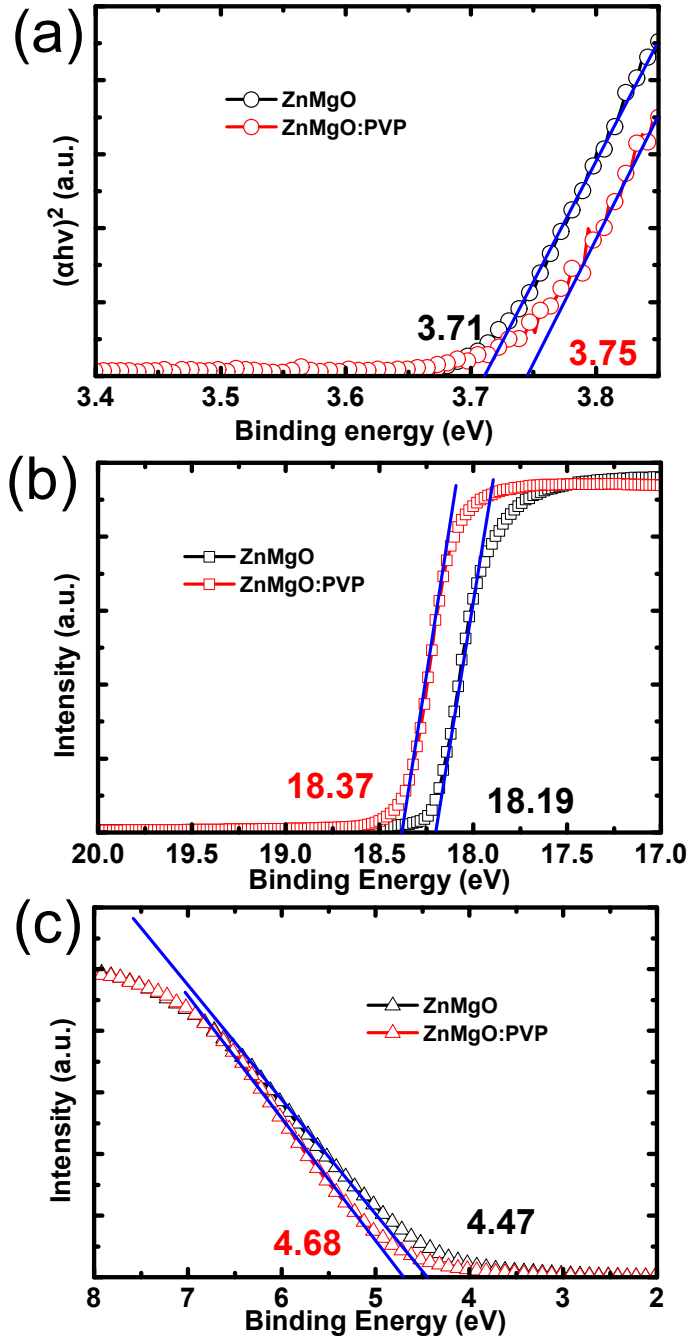

Figure S1. (a)  $(\alpha h\nu)^2$ - $h\nu$  plots obtained by transformation of the absorption spectra of ZnMgO NPs and ZnMgO:PVP hybrid films. (b) secondary-electron cut-off and (c) valence band edge regions of ZnMgO NPs and ZnMgO:PVP hybrid films. According to the equation of VBM (valence band maximum) =  $21.22 - (E_{\text{cut-off}} (\text{high-binding energy cut-off}) - E_{\text{onset}} (\text{onset energy in valence-band region}))$ , the VBM of the ZnMgO and ZnMgO:PVP are estimated to be 7.50 eV and 7.53 eV, respectively. The band gap of ZnMgO and ZnMgO:PVP are about 3.71 eV and 3.75 eV, respectively, which were obtained from the UV-visible absorption spectra. Consequently, the

derived conduction band minimum (CBM) are 3.79 eV for ZnMgO and 3.78 eV for ZnMgO:PVP.

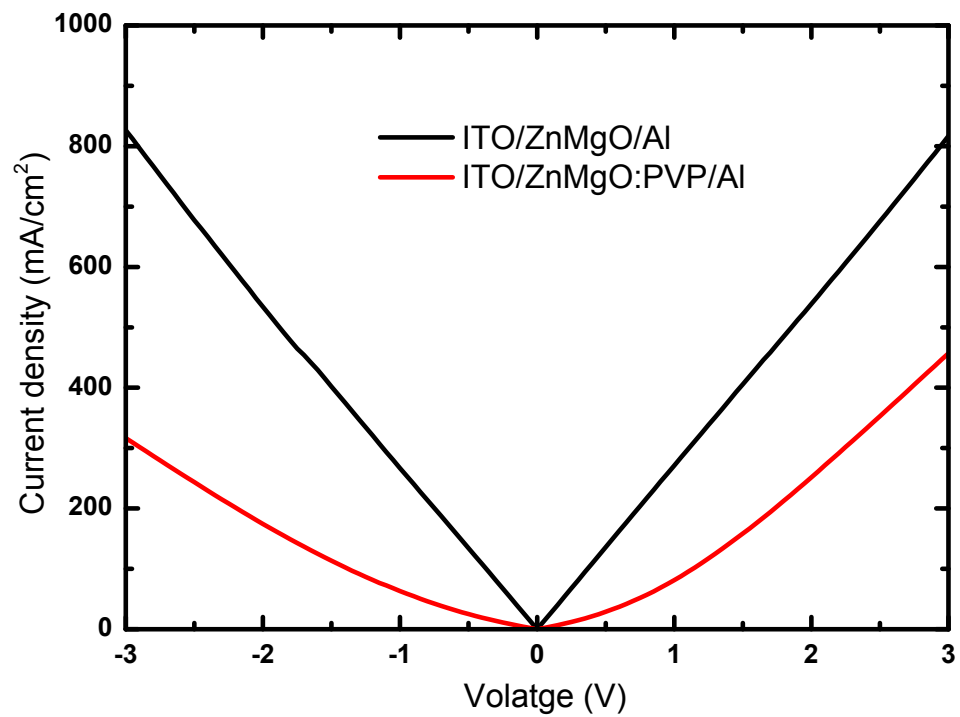

Figure S2. Comparison of J-V characteristics of the ETL-only devices with the structures of ITO/ZnMgO/Al and ITO/ZnMgO:PVP/Al.

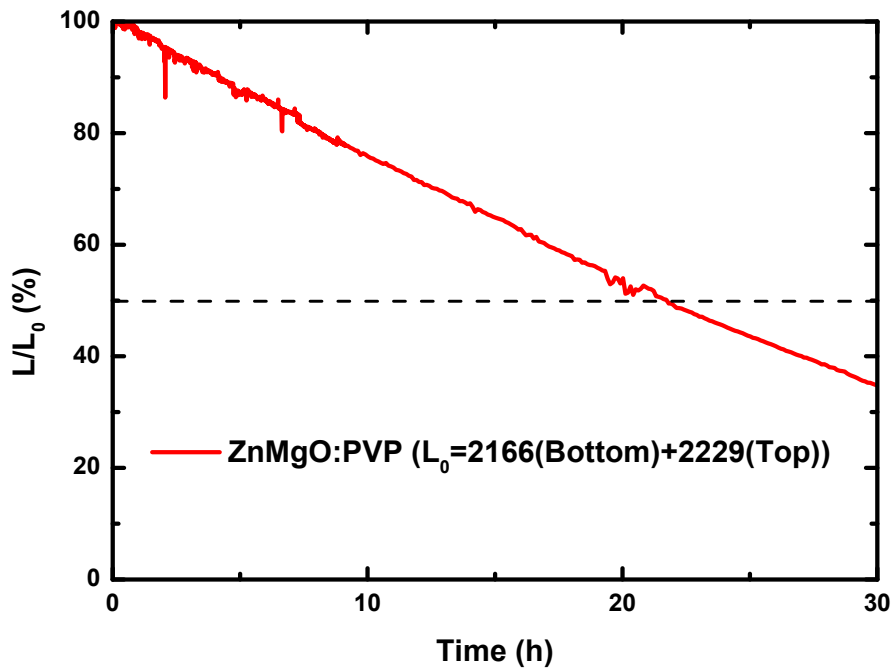

Figure S3. Lifetime curve of the transparent QLEDs with ZnMgO:PVP as ETL. By using the relation  $L/L_0 = \text{constant}$  and assuming an acceleration factor of  $n = 1.5$ , the  $T_{50}$  of this transparent QLEDs at  $100 \text{ cd/m}^2$  is estimated to be more than 6323 h.

Table S1. The key performances of the representative transparent QLEDs in literature.

| Anode      | Cathode    | Max. Transparency | Von (V)<br>(single side) | Max. CE<br>(cd/A)<br>(single side) | Max. L (cd/m <sup>2</sup> )    |                                |                                | Ref.        |
|------------|------------|-------------------|--------------------------|------------------------------------|--------------------------------|--------------------------------|--------------------------------|-------------|
|            |            |                   |                          |                                    | Bottom                         | Top                            | Total                          |             |
| ITO        | Ag         | ~ 60%             | 2.95                     | 1.25                               | 10540<br>(@ 8.6 V)             | 2800<br>(@ 8.6 V)              | 13340<br>(@ 8.6 V)             | 1           |
| Graphene   | Graphene   | ~ 75 %            | ~ 20                     | 0.45                               | 358<br>(@ 29 V)                | -                              | -                              | 2           |
| ITO        | AgNW       | ~ 72 %            | ~2.5                     | 5.6                                | <20000<br>(@ 6 V)              | <20000<br>(@ 6 V)              | <40000<br>(@ 6 V)              | 3           |
| ITO        | IZO        | ~ 84 %            | ~ 8                      | 0.45                               | 200<br>(@ 16 V)                | -                              | -                              | 4           |
| ITO        | ITO        | ~ 80 %            | ~ 2.5                    | 3.5                                | 9146<br>(@ 15 V)               | <9146<br>(@ 15 V)              | <18292<br>(@ 15 V)             | 5           |
| ITO        | ITO        | ~ 91              | ~ 3                      | 17.52                              | <20000<br>(@ 6 V)              | <20000<br>(@ 6 V)              | <40000<br>(@ 6 V)              | 6           |
| <b>ITO</b> | <b>ITO</b> | <b>~ 88</b>       | <b>2.1</b>               | <b>22.75</b>                       | <b>20400</b><br><b>(@ 6 V)</b> | <b>22210</b><br><b>(@ 6 V)</b> | <b>42610</b><br><b>(@ 6 V)</b> | <b>ours</b> |

## References

- [1] Kim, H.-M.; bin Mohd Yusoff, A. R.; Kim, T.-W.; Seol, Y.-G.; Kim, H.-P.; Jang, J. Semi-Transparent Quantum-Dot Light Emitting Diodes with an Inverted Structure. *J. Mater. Chem. C* **2014**, *2*, 2259–2265.
- [2] Seo, J.-T.; Han, J.; Lim, T.; Lee, K.-H.; Hwang, J.; Yang, H.; Ju, S. Fully Transparent Quantum Dot Light-Emitting Diode Integrated with Graphene Anode and Cathode. *ACS Nano* **2014**, *8*, 12476–12482.
- [3] Jing, P.; Ji, W.; Zeng, Q.; Li, S.; Qu, S.; Wang, J.; Zhang, D. Vacuum-Free Transparent Quantum Dot Light-Emitting Diodes with Silver Nanowire Cathode. *Sci. Rep.* **2015**, *5*, 12499.
- [4] Kim, H. Y.; Park, Y. J.; Kim, J.; Han, C. J.; Lee, J.; Kim, Y.; Greco, T.; Ippen, C.; Wedel, A.; Ju, B.-K.; Oh, M. S. Transparent InP Quantum Dot Light-Emitting Diodes with ZrO<sub>2</sub> Electron Transport Layer and Indium Zinc Oxide Top Electrode. *Adv. Funct. Mater.* **2016**, *26*, 3454–3461.

- [5] Wang, W.; Peng, H.; Chen, S. Highly Transparent Quantum-Dot Light-Emitting Diodes with Sputtered Indium-Tin-Oxide Electrodes. *J. Mater. Chem. C* **2016**, *4*, 1838–1841.
- [6] Choi, M. K.; Yang, J.; Kim, D. C.; Dai, Z.; Kim, J.; Seung, H.; Kale, V. S.; Sung, S. J.; Park, C. R.; Lu, N.; Hyeon, T.; Kim, D.-H. Extremely Vivid, Highly Transparent, and Ultrathin Quantum Dot Light-Emitting Diodes. *Adv. Mater.* **2018**, *30*, 1703279.
